# Supplementary material
Source: Springer Nature journal article supplement (https://www.springermedizin.de/resource/supplementary/12889_2014_6582_MOESM2_ESM.pdf/9498488)
Supplement: MOESM2 [file 9498488]

USA), and data entry screens were used to revise incorrect

**Table 1 Social demographic data (Number of respondents = 1207)**

| Characteristics         | N (%)      | Characteristics            | N (%)      |
|-------------------------|------------|----------------------------|------------|
| <b>Age</b>              |            | <b>Education level</b>     |            |
| 60 to 69                | 524 (43.4) | Primary school or below    | 506 (41.9) |
| 70 to 79                | 504 (41.8) | Primary school             | 327 (27.1) |
| ≥80                     | 179 (14.8) | Middle school              | 194 (16.1) |
| <b>Living with whom</b> |            | High school and above      | 180 (14.9) |
| Self                    | 162 (13.4) | <b>Previous occupation</b> |            |
| Spouse                  | 753 (62.4) | Administrative/Technical   | 270 (22.4) |
| Children and family     | 270 (22.4) | staff                      |            |
| Other people            | 22 (1.8)   | Factory workers            | 299 (24.8) |
| <b>Marital status</b>   |            | Migrant workers            | 45 (3.7)   |
| Married                 | 918 (76.1) | Farmers                    | 436 (36.1) |
| Unmarried/Divorced      | 11 (0.9)   | No work                    | 157 (13)   |
| Widowed                 | 278 (23.0) | <b>Chronic diseases</b>    |            |
|                         |            | No                         | 456 (37.8) |
|                         |            | Yes                        | 751 (62.2) |

**Table 1**

**Social demographic data (Number of respondents = 1207)**

| Characteristics         | N (%)      | Characteristics            | N (%)      |
|-------------------------|------------|----------------------------|------------|
| <b>Age</b>              |            | <b>Education level</b>     |            |
| 60 to 69                | 524 (43.4) | Primary school or below    | 506 (41.9) |
| 70 to 79                | 504 (41.8) | Primary school             | 327 (27.1) |
| ≥80                     | 179 (14.8) | Middle school              | 194 (16.1) |
| <b>Living with whom</b> |            | High school and above      | 180 (14.9) |
| Self                    | 162 (13.4) | <b>Previous occupation</b> |            |
| Spouse                  | 753 (62.4) | Administrative/Technical   | 270 (22.4) |
| Children and family     | 270 (22.4) | staff                      |            |
| Other people            | 22 (1.8)   | Factory workers            | 299 (24.8) |
| <b>Marital status</b>   |            | Migrant workers            | 45 (3.7)   |
| Married                 | 918 (76.1) | Farmers                    | 436 (36.1) |
| Unmarried/Divorced      | 11 (0.9)   | No work                    | 157 (13)   |
| Widowed                 | 278 (23.0) | <b>Chronic diseases</b>    |            |
|                         |            | No                         | 456 (37.8) |
|                         |            | Yes                        | 751 (62.2) |

Yin *et al.*

Yin *et al.* *BMC Public Health* 2013 **13**:710 doi:10.1186/1471-2458-13-710

[OPEN DATA](#)
